# Supplementary material
Source: PubMed Central journal article supplement (PMC1859954)
Supplement: pnas_0603364103_3.pdf [file pnas_0603364103_3.pdf]

**Table 2.** Summary of environments and algorithm results. 54 environments were identified that support growth on Biolog plates but that can not be reconciled with the current metabolic reconstruction. All Biolog data comes from the company website ([www.biolog.com/accesstoPMTech.html](http://www.biolog.com/accesstoPMTech.html)) with the exception of propionate (PM1 F7) where evidence from mutant growth on Biolog plates (available from ASAP database) was used to indicate that *E. coli* could grow on propionate. The 54 environments are divided up into 5 cases: (1) cases where the algorithm could identify solutions, (2) cases where no solutions could be found either because the metabolite didn't exist in the U matrix or none of the reactions in the matrix could explain growth, (3) environments with no matching KEGG ids (so they are not in the U matrix either), (4) known incorrect Biolog results, and (5) cases which could be reconciled with the current *E. coli* literature. For the 26 cases for which the algorithm could identify solutions, the number is given in the "Number of Solutions" column. The "Evaluated Phenotypes" column indicates the results from phenotyping experiments if conducted in this study. The "Min # Rxns" column indicates how many reactions (metabolic and transport) are needed, for cases with multiple solutions this number is the smallest number of reactions that are needed.

### 1. Environments with Identifiable Solutions

| <b>Biolog Well ID</b> | <b>Biolog Result</b> | <b>Source</b> | <b>Compound Name</b>        | <b>Kegg ID</b> | <b>Number of Solutions</b>          | <b>Evaluated Phenotypes</b> | <b>Min. # Rxns</b> |
|-----------------------|----------------------|---------------|-----------------------------|----------------|-------------------------------------|-----------------------------|--------------------|
| PM1 C12               | Strong               | Carbon        | thymidine                   | C00214         | Only 10 Solutions Identified        | Confirmed batch growth      | 1                  |
| PM1 G11               | Strong               | Carbon        | D-malate                    | C00497         | Only 2 Solutions Identified         | Confirmed batch growth      | 2                  |
| PM1 C2                | Strong               | Carbon        | D-galactonate-gamma-lactone | C03383         | Only 1 Solution Identified          | Confirmed batch growth      | 2                  |
| PM1 H9                | Strong               | Carbon        | L-galactonate-gamma-lactone | C01115         | >15 Solutions Identified            | Confirmed batch growth      | 6                  |
| PM3 B5                | Strong               | Nitrogen      | L-leucine                   | C00123         | >15 Solutions Identified            | Not Tested                  | 2                  |
| PM3 B8                | Strong               | Nitrogen      | L-phenylalanine             | C00079         | >15 Solutions Identified            | Not Tested                  | 1                  |
| PM3 B6                | Strong               | Nitrogen      | L-lysine                    | C00047         | >15 Solutions Identified            | Not Tested                  | 2                  |
| PM3 B7                | Strong               | Nitrogen      | L-methionine                | C00073         | >15 Solutions Identified            | Not Tested                  | 2                  |
| PM3 C1                | Strong               | Nitrogen      | L-tyrosine                  | C00082         | >15 Solutions Identified            | Not Tested                  | 1                  |
| PM3 G1                | Strong               | Nitrogen      | xanthine                    | C00385         | >15 Solutions Identified            | No batch growth observed    | 1                  |
| PM3 G2                | Strong               | Nitrogen      | xanthosine                  | C01762         | >15 Solutions Identified            | No batch growth observed    | 1                  |
| PM3 G9                | Strong               | Nitrogen      | e-amino-N-caproate          | C02378         | >15 Solutions Identified            | Not Tested                  | 7                  |
| PM3 G11               | Strong               | Nitrogen      | D-amino-N-valerate          | C00431         | >15 Solutions Identified            | Not Tested                  | 3                  |
| PM3 C10               | Strong               | Nitrogen      | L-citrulline                | C00327         | Only needs transporter (1 solution) | Confirmed batch growth      | 1                  |
| PM1 F10               | Strong               | Carbon        | glyoxylate                  | C00048         | Only needs transporter (1 solution) | Confirmed batch growth      | 1                  |
| PM2 E12               | Strong               | Carbon        | 5-keto-D-gluconate          | C01062         | Only needs transporter (1 solution) | Confirmed batch growth      | 1                  |
| PM1 F7                | Mutants              | Carbon        | Propionate                  | C00163         | Only needs transporter (1 solution) | Confirmed batch growth      | 1                  |
| PM1 E7                | Weak                 | Carbon        | alpha-hydroxy butyrate      | C05984         | Only 1 Solution Identified          | No batch growth observed    | 2                  |
| PM1 H6                | Weak                 | Carbon        | L-lyxose                    | C01508         | Only 12 Solutions Identified        | No batch growth observed    | 3                  |
| PM1 D7                | Weak                 | Carbon        | alpha-ketobutyrate          | C00109         | Only needs transporter (1 solution) | No batch growth observed    | 1                  |
| PM2 F5                | Weak                 | Carbon        | oxalomalate                 | C01990         | Only 1 Solution Identified          | Not Tested                  | 2                  |
| PM3 D12               | Weak                 | Nitrogen      | agmatine                    | C00179         | Only needs transporter (1 solution) | Confirmed batch growth      | 1                  |
| PM3 B3                | Weak                 | Nitrogen      | L-histidine                 | C00135         | >15 Solutions Identified            | Not Tested                  | 2                  |
| PM3 B4                | Weak                 | Nitrogen      | L-isoleucine                | C00407         | >15 Solutions Identified            | Not Tested                  | 1                  |

### 1. (cont.) Environments with Identifiable Solutions

| <b>Biolog</b>  | <b>Biolog</b> |               |                       |                |                                     |                             | <b>Min. #</b> |
|----------------|---------------|---------------|-----------------------|----------------|-------------------------------------|-----------------------------|---------------|
| <b>Well ID</b> | <b>Result</b> | <b>Source</b> | <b>Compound Name</b>  | <b>Kegg ID</b> | <b>Number of Solutions</b>          | <b>Evaluated Phenotypes</b> | <b>Rxns</b>   |
| PM2 A8         | Weak          | Carbon        | glycogen              | C00182         | Only needs transporter (1 solution) | Not Tested                  | 1             |
| PM2 E10        | Weak          | Carbon        | beta-hydroxy pyruvate | C00168         | Only needs transporter (1 solution) | Not Tested                  | 1             |

### 2. Environments with No Solutions or Not in Universal Database (U)

| <b>Biolog</b>  | <b>Biolog</b> |               |                        |                |                            |
|----------------|---------------|---------------|------------------------|----------------|----------------------------|
| <b>Well ID</b> | <b>Result</b> | <b>Source</b> | <b>Compound Name</b>   | <b>Kegg ID</b> | <b>Number of Solutions</b> |
| PM1 D10        | Strong        | Carbon        | lactulose              | C07064         | Metabolite not in U        |
| PM3 E10        | Strong        | Nitrogen      | D-mannosamine          | C03570         | Metabolite not in U        |
| PM2 C7         | Strong        | Carbon        | b-methyl-D-galactoside | C03619         | No Solutions               |
| PM2 A6         | Strong        | Carbon        | Dextrin                | C00721         | Metabolite not in U        |
| PM1 H5         | Weak          | Carbon        | Psicose                | C06468         | Metabolite not in U        |
| PM2 A12        | Weak          | Carbon        | pectin                 | C00714         | Metabolite not in U        |
| PM3 C4         | Weak          | Nitrogen      | D-asparagine           | C01905         | Metabolite not in U        |

### 3. Environments with No Matching Kegg ID

| <b>Biolog</b>  | <b>Biolog</b> |               |                                      |                     |
|----------------|---------------|---------------|--------------------------------------|---------------------|
| <b>Well ID</b> | <b>Result</b> | <b>Source</b> | <b>Compound Name</b>                 |                     |
| PM1 G6         | Strong        | Carbon        | L-alanyl-glycine                     | Metabolite not in U |
| PM1 G9         | Strong        | Carbon        | Mono Methyl Succinate                | Metabolite not in U |
| PM1 G10        | Strong        | Carbon        | methyl pyruvate                      | Metabolite not in U |
| PM1 D8         | Strong        | Carbon        | alpha-methyl-D-galactoside           | Metabolite not in U |
| PM2 F1         | Strong        | Carbon        | D-lactic acid methyl ester           | Metabolite not in U |
| PM3 E6         | Strong        | Nitrogen      | Glucuronamide                        | Metabolite not in U |
| PM1 F1         | Strong        | Carbon        | glycyl-L-aspartate                   | Metabolite not in U |
| PM1 E8         | Weak          | Carbon        | beta-methyl-D-glucoside              | Metabolite not in U |
| PM1 F6         | Weak          | Carbon        | bromo-succinate                      | Metabolite not in U |
| PM2 A4         | Weak          | Carbon        | beta-cyclodextrin                    | Metabolite not in U |
| PM2 B12        | Weak          | Carbon        | 3-0-b-D-galactopyranosyl-D-arabinose | Metabolite not in U |
| PM2 C8         | Weak          | Carbon        | 3-methyl glucose                     | Metabolite not in U |
| PM3 D2         | Weak          | Nitrogen      | N-phthaloyl-L-glutamate              | Metabolite not in U |
| PM3 G4         | Weak          | Nitrogen      | alloxan                              | Metabolite not in U |
| PM1 G1         | Weak          | Carbon        | glycyl-L-glutamate                   | Metabolite not in U |
| PM1 H1         | Weak          | Carbon        | glycyl-L-proline                     | Metabolite not in U |

#### 4. Previous Experiments Contradict Biolog Results

| <b>Biolog</b>  | <b>Biolog</b> |               |                      |
|----------------|---------------|---------------|----------------------|
| <b>Well ID</b> | <b>Result</b> | <b>Source</b> | <b>Compound Name</b> |
| PM1 B10        | Weak          | Carbon        | formate              |

#### 5. Environments Which Can Be Resolved By Current Literature

| <b>Biolog</b>  | <b>Biolog</b> |               |                      |                |                            |
|----------------|---------------|---------------|----------------------|----------------|----------------------------|
| <b>Well ID</b> | <b>Result</b> | <b>Source</b> | <b>Compound Name</b> | <b>Kegg ID</b> | <b>Number of Solutions</b> |
| PM2 B3         | Strong        | Carbon        | beta-D-allose        | C01487         | Metabolite not in U        |
| PM1 E3         | Strong        | Carbon        | glucose-1-phosphate  | C00103         | Needs transport mechanism  |
| PM1 E4         | Strong        | Carbon        | fructose-6-phosphate | C00085         | Needs transport mechanism  |
| PM3 A11        | Strong        | Nitrogen      | L-cysteine           | C00097         | >15 Solutions Identified   |
