# Supplementary material
Source: PubMed Central journal article supplement (PMC1859954)
Supplement: pnas_0603364103_4.pdf [file pnas_0603364103_4.pdf]

**Table 3.** Mutants evaluated for growth on different carbon sources. Growth on five different carbon sources was used to identify genes involved in the catabolism of the carbon sources. Each carbon source is shown in the table as a different column, with the three that are only missing transport activities in the columns 3 through 5. A '+' indicates that the mutant had similar growth behavior to the parental strain, and a '-' indicates the mutant had a different growth behavior than the parental strain (for these cases the comments column describes the observed differences). Blank entries indicate that the mutant was not evaluated on this carbon source.

| BNUM            | GENE NAME | Thymidine | 5-Keto-D-Gluconate | Propionate | D-malate | L-galactonate | COMMENTS                                                                                                                                                                                                                                                      |
|-----------------|-----------|-----------|--------------------|------------|----------|---------------|---------------------------------------------------------------------------------------------------------------------------------------------------------------------------------------------------------------------------------------------------------------|
| b3654           | yicE      | +         |                    |            |          |               |                                                                                                                                                                                                                                                               |
| b1006           | ycdG      | +         |                    |            |          |               |                                                                                                                                                                                                                                                               |
| b2497           | uraA      | +         |                    |            |          |               |                                                                                                                                                                                                                                                               |
| b2406           | xapB      | +         |                    |            |          |               |                                                                                                                                                                                                                                                               |
| b2964           | nupG      | -         |                    |            |          |               | NupG mutant has a lower growth rate than parental strain, likely due to decreased thymidine uptake                                                                                                                                                            |
| b2393           | nupC      | +         |                    |            |          |               |                                                                                                                                                                                                                                                               |
| b2161           | nupX      | +         |                    |            |          |               |                                                                                                                                                                                                                                                               |
| b2164           | yeiM      | +         |                    |            |          |               |                                                                                                                                                                                                                                                               |
| b0336           | codB      | +         |                    |            |          |               |                                                                                                                                                                                                                                                               |
| b0511           | ybbW      | +         |                    |            |          |               |                                                                                                                                                                                                                                                               |
| b3714           | yieG      | +         |                    |            |          |               |                                                                                                                                                                                                                                                               |
| b3664           | yicO      | +         |                    |            |          |               |                                                                                                                                                                                                                                                               |
| b4064           | yjcD      | +         |                    |            |          |               |                                                                                                                                                                                                                                                               |
| b2884,<br>b2885 | ygfR,ygfQ | +         |                    |            |          |               |                                                                                                                                                                                                                                                               |
| b2882           | ygfO      | +         |                    |            |          |               |                                                                                                                                                                                                                                                               |
| b0513           | ybbY      | +         |                    |            |          |               |                                                                                                                                                                                                                                                               |
| b2888           | ygfU      | +         |                    |            |          |               |                                                                                                                                                                                                                                                               |
| b3035           | tolC      | -         |                    |            |          |               | TolC mutant shows altered growth lower overall biomass yield and growthrate (in flask and Bioscreen C), this may be a global effect as Biolog data for this mutant shows defective growth in 19 out of 38 carbon source environments (see text for reference) |
| b3266           | acrF      | +         |                    |            |          |               |                                                                                                                                                                                                                                                               |
| b0463           | acrA      | +         |                    |            |          |               |                                                                                                                                                                                                                                                               |
| b2685           | emrA      | +         |                    |            |          |               |                                                                                                                                                                                                                                                               |
| b2686           | emrB      | +         |                    |            |          |               |                                                                                                                                                                                                                                                               |
| b0462           | acrB      | +         |                    |            |          |               |                                                                                                                                                                                                                                                               |
| b0879           | macB      | +         |                    |            |          |               |                                                                                                                                                                                                                                                               |
| b2075           | mdtB      | +         |                    |            |          |               |                                                                                                                                                                                                                                                               |
| b2470           | acrD      | +         |                    |            |          |               |                                                                                                                                                                                                                                                               |
| b2367           | emrY      | +         |                    |            |          |               |                                                                                                                                                                                                                                                               |
| b3514           | yhiV      | +         |                    |            |          |               |                                                                                                                                                                                                                                                               |
| b2076           | mdtC      | +         |                    |            |          |               |                                                                                                                                                                                                                                                               |

| BNUM  | GENE NAME | 5-Keto-D-Gluconate |            |          | L-galactonate | COMMENTS                                                                                                                                            |
|-------|-----------|--------------------|------------|----------|---------------|-----------------------------------------------------------------------------------------------------------------------------------------------------|
|       |           | Thymidine          | Propionate | D-malate |               |                                                                                                                                                     |
| b4265 | idnT      | -                  |            |          |               | Slower growth in Bioscreen C and flasks                                                                                                             |
| b3415 | gntT      | +                  |            |          |               |                                                                                                                                                     |
| b4476 | gntU      | +                  |            |          |               |                                                                                                                                                     |
| b4321 | gntP      | +                  | +          |          |               |                                                                                                                                                     |
| b1296 | ycjJ      |                    | -          |          |               | Reduced growth rate in Bioscreen, but when antibiotic resistance gene is removed the mutant grows at the same rate as the parental strain in flasks |
| b4067 | ycjG      |                    | +          |          |               |                                                                                                                                                     |
| b3258 | panF      |                    | +          |          |               |                                                                                                                                                     |
| b1015 | putP      |                    | -          |          |               | Reduced growth rate in Bioscreen and flask                                                                                                          |
| b1800 | yeaU      |                    |            | -        |               | Lethal in both Bioscreen and flask experiments                                                                                                      |
| b1479 | sfcA      |                    |            | +        |               |                                                                                                                                                     |
| b2463 | maeB      |                    |            | +        |               |                                                                                                                                                     |
| b4138 | dcuA      |                    |            | +        |               |                                                                                                                                                     |
| b4123 | dcuB      |                    |            | +        |               |                                                                                                                                                     |
| b0621 | dcuC      |                    |            | +        |               |                                                                                                                                                     |
| b3227 | dcuD      |                    |            | +        |               |                                                                                                                                                     |
| b3528 | dctA      |                    |            | -        |               | In both Bioscreen and flask experiments strain grows after 2 days with a slower growth rate than the parental strain                                |
| b1799 | yeaT      |                    |            | -        |               | Lethal in Bioscreen;In flask experiments strain grows after 2 days with a much slower growth rate than the parental strain                          |
| b1801 | yeaV      |                    |            | +        |               | Shows altered growth on L-malate but normal growth on D-malate in the Bioscreen                                                                     |
| b3091 | uxaA      |                    |            | -        |               | Lethal in Bioscreen, untested in flask since phenotype has been previously reported                                                                 |
| b1521 | uxaB      |                    |            | +        |               | UxaB mutant shows a prolonged lag period (~2days) but is able to grow after this point (another isozyme is present in the genome, uxuB)             |
| b3092 | uxaC      |                    |            | -        |               | Lethal in Bioscreen, while not needed for the catabolism of L-galactonate it might affect the expression of uxaA                                    |
| b1545 | ydfL      |                    |            | +        |               |                                                                                                                                                     |
| b2172 | yeiQ      |                    |            | +        |               |                                                                                                                                                     |
| b4356 | yjjL      |                    |            | -        |               | Lethal in both Bioscreen and flask experiments                                                                                                      |
| b4357 | yjjM      |                    |            | -        |               | Lethal in both Bioscreen and flask experiments                                                                                                      |
| b4358 | yjjN      |                    |            | -        |               | Lethal in Bioscreen;In flask experiments strain grows after 2 days with a slower growth rate than the parental strain                               |
| b3094 | exuR      |                    |            | +        |               | ExuR mutant shows a slightly shorter lag period than the parental strain, most likely due to a loss in repression of the uxaABC genes               |

+ indicates normal growth

- indicates significantly altered growth
