# Supplementary material
Source: PubMed Central journal article supplement (PMC1859954)
Supplement: pnas_0603364103_6.pdf [file pnas_0603364103_6.pdf]

**Table 5.** Relative expression levels normalized to internal control gene, *acpP*. RT-PCR was used to measure the enrichment of DNA bound to YeaT protein when cells are grown on D-malate. The numbers reported in the first two columns are the expression levels normalized to the internal control gene *acpP* for the control strain with normal YeaT (BW25113) and for the YeaT-8x myc strain. All values are reported as the mean +/- the standard deviation (where 3 technical replicates are done for each of the three biological replicate samples). The RT primers that were used are listed in the last two columns.

|      | <b>BW25113 D-malate</b> | <b>yeaT 8xmyc D-malate</b> | <b>Left Primer (5' -&gt; 3')</b> | <b>Right Primer (5' -&gt; 3')</b> |
|------|-------------------------|----------------------------|----------------------------------|-----------------------------------|
| yeaU | 0.056465 +/- 0.007886   | 1.4002 +/- 0.238728        | gggttctcacttcctgacca             | cgagccaccagcataaagac              |
