# Supplementary material
Source: PubMed Central journal article supplement (PMC1859954)

## Batch Growth on 5-Keto-D-Gluconate

A

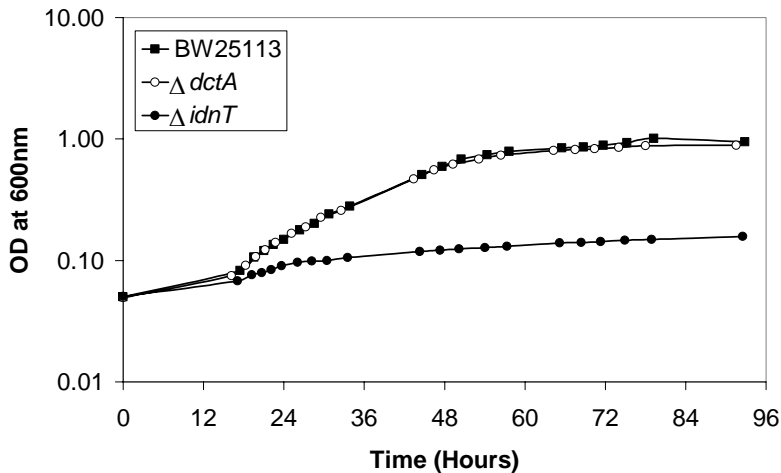

## Batch Growth on Propionate

B

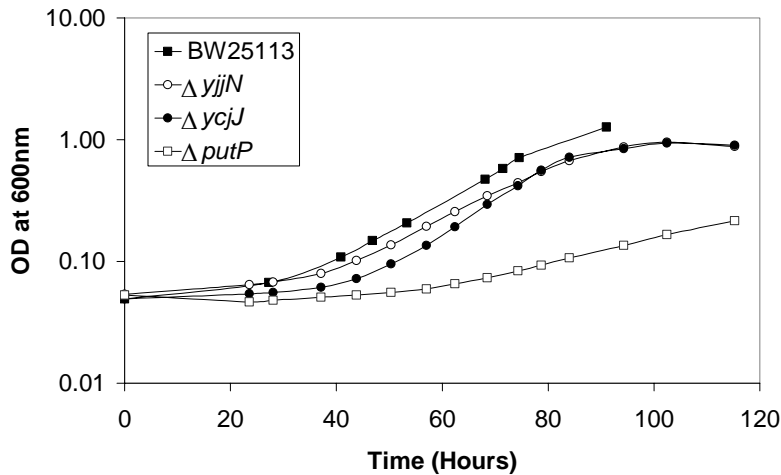

Supplement: pnas_0603364103_1.pdf [file pnas_0603364103_1.pdf]

BW25113 Batch Growth on Thymidine

A

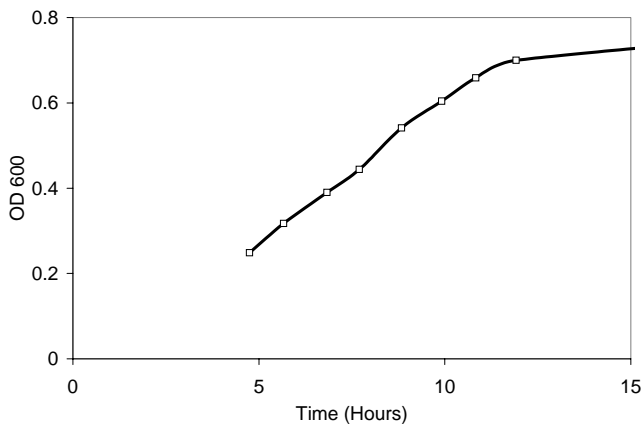

B

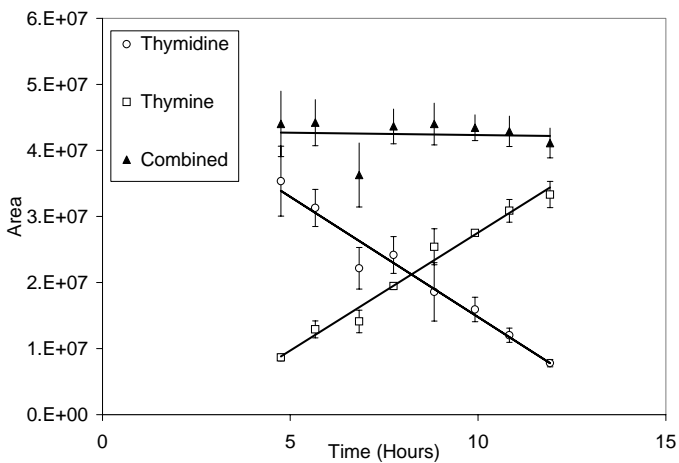

MultiDrug Efflux Mutants

C

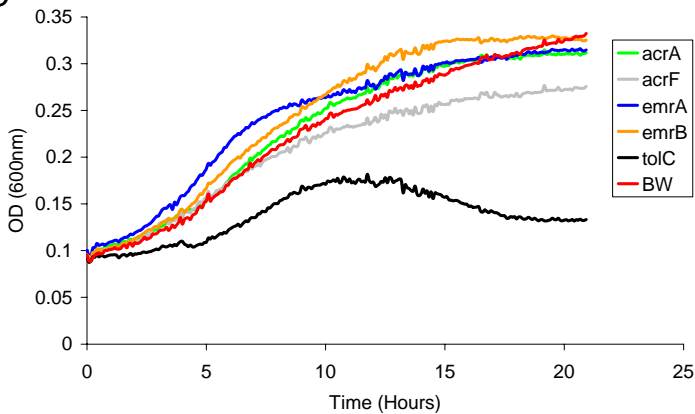

Supplement: pnas_0603364103_2.pdf [file pnas_0603364103_2.pdf]
